# Supplementary material
Source: PubMed Central journal article supplement (PMC3509247)
Supplement: NIHMS419847-supplement-S1.pdf [file NIHMS419847-supplement-S1.pdf]

# 1A

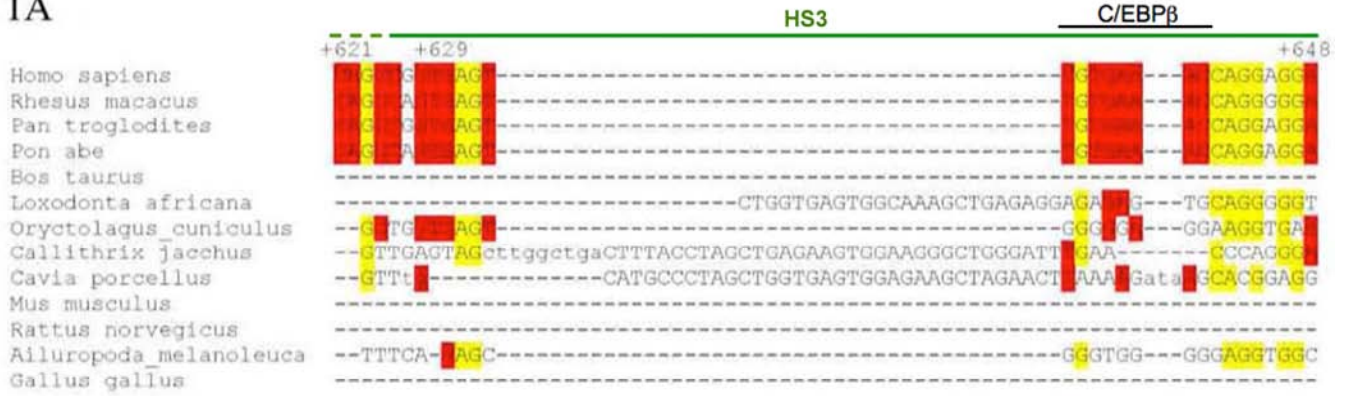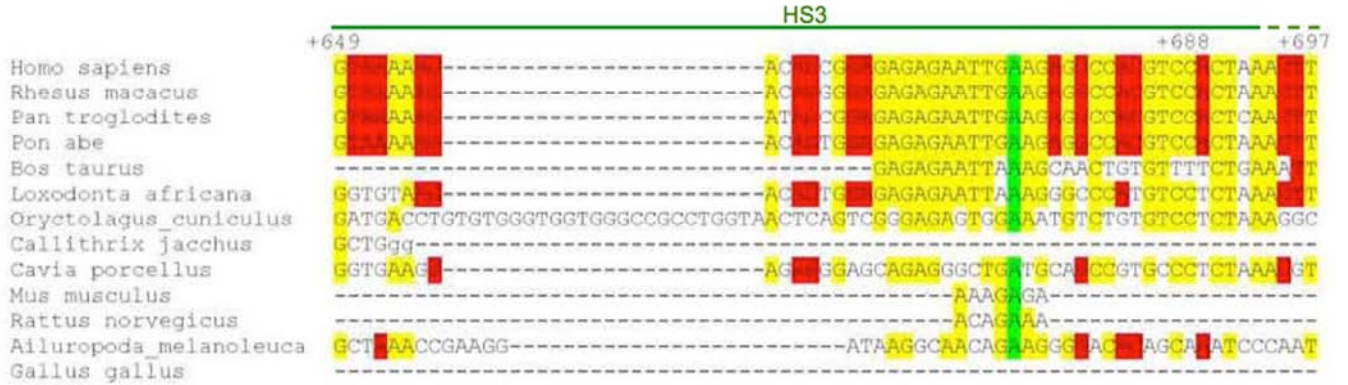

# 1B

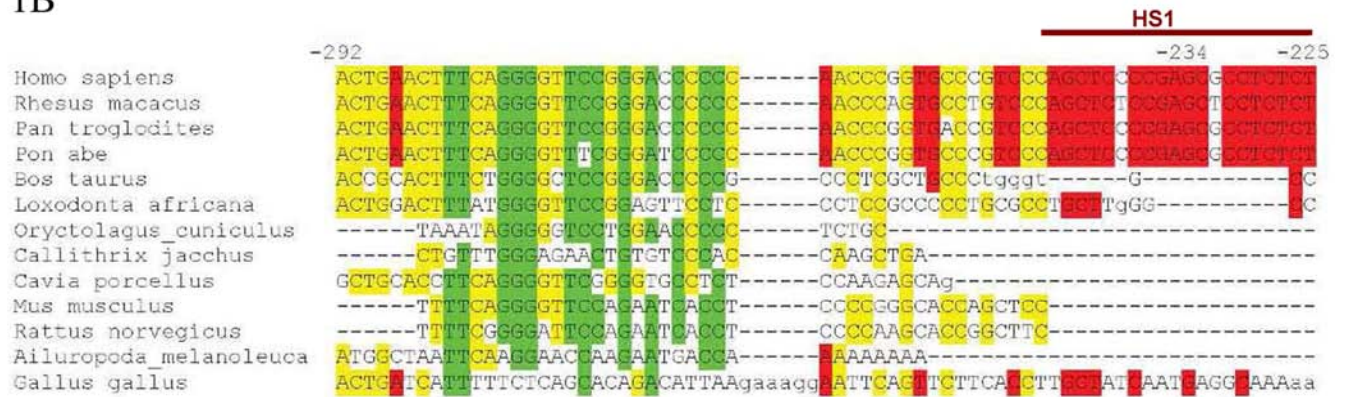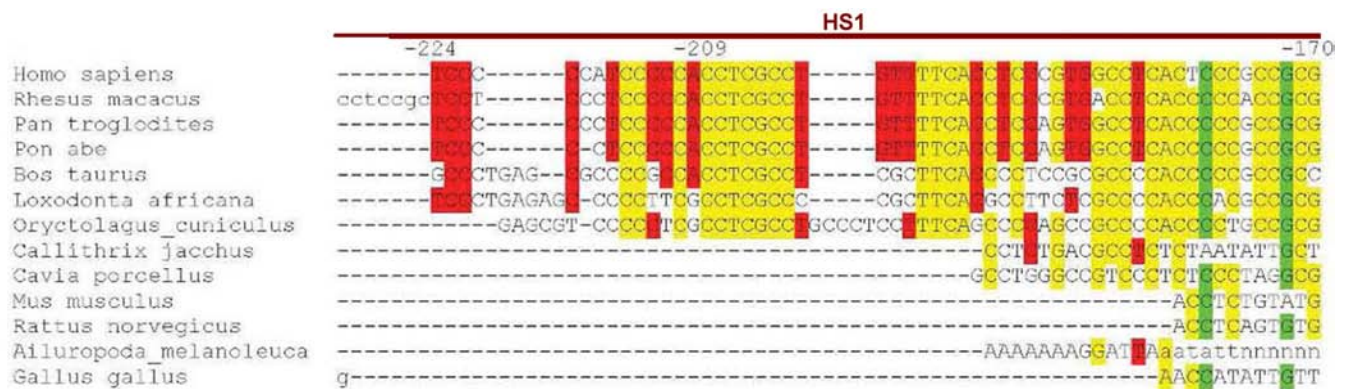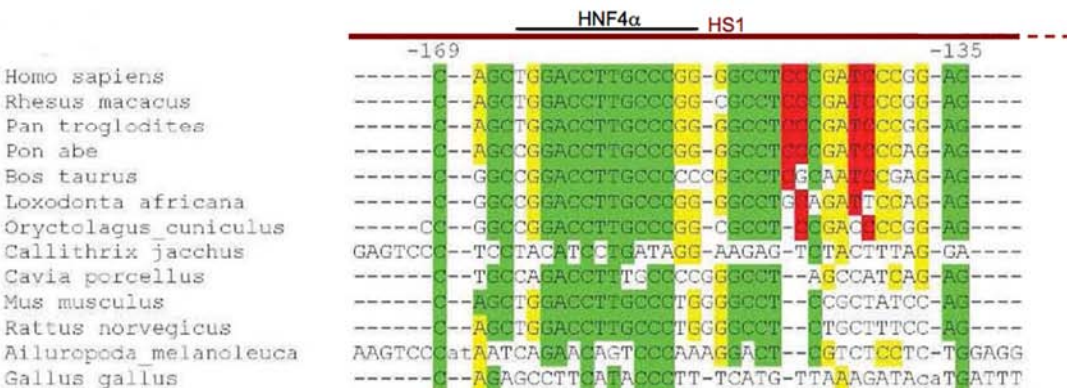

**Supplementary Figure 1** : Results of the alignment of different regions of the human *ABCC6* gene and the orthologs in 13 vertebrate species. Colors indicate nucleotide conservation: green: 10 species or more, yellow: 7 species or more, red: in all primates. 500 nucleotides upstream and 2kb downstream of the annotated TSS were considered. A) Alignment of the human +629/+688 intronic region. B) alignment of proximal promoter regions. Regions located in HS1 or HS3 are indicated by horizontal bars. C/EBP $\beta$  and HNF4 $\alpha$  binding sites are indicated. Consensus C/EBP $\beta$  binding site present in primates is located between +632/+640 and is either completely absent or interrupted by insertions/mutations in the other species.

|                                                 | Forward (numbering relative to ATG)               | Reverse (numbering relative to ATG)               |
|-------------------------------------------------|---------------------------------------------------|---------------------------------------------------|
| ABCC6 primers for Southern blot probe           | +1435<br>GGGTTAATGTCAGGATGAAAGG                   | +1735<br>CATCTACCTCCTCTTCATCCAC                   |
| ABCC6 primers for luciferase constructs         | -332<br>TCGGTACCGATTCTTGTTGCAGG<br>GGG            | +72<br>ACCAAGCTTGGAAAAGGAGAGT<br>GGGGC            |
|                                                 | -234<br>CTCGGTACCCGCCTCTCTTCCCC<br>CAT            | +513<br>CAAAAGCTTTAGCAGCATGGCA<br>CAAGG           |
|                                                 | -209<br>CCGGTACCTCGCCTGTTTTACCC<br>TCC            | +629<br>TCAAGCTTCACCGGCTGTGCAAA<br>CTT            |
|                                                 | -145<br>CGGGTACCGAGCTCGAATCCCA<br>GCCG            | +652<br>TGGAAGCTTACTCCTCCTGGTTT<br>CACA           |
|                                                 |                                                   | +688<br>AGAAGCTTGGACGTGGCCTCTTC<br>AAT            |
|                                                 |                                                   | +817<br>TCAAGCTTAATCCTCCTGCCTCA<br>GCC            |
|                                                 |                                                   | +960<br>CAAAAGCTTTCAAGCAATCCTCC<br>CACC           |
| ABCC6 primers for mutated luciferase constructs | mut1f<br>TATTAATCCATTTAATTCCCCTC<br>ATAGAGGTAGA   | mut1r<br>TCTACCTCTATGAGGGGAATTAA<br>ATGGATTAATA   |
|                                                 | mut2f<br>TTCCCCCTTTTACAGGGAAGTAC<br>CCTGAGATACA   | mut2r<br>TGTATCTCAGGGTACTTCCCTGT<br>AAAAGGGGGAA   |
|                                                 | mut3f<br>CAGCCGGTGAGTTGTTACCCCA<br>GGAGGAGTAAA    | mut3r<br>TTTACTCCTCCTGGGGTAACAAC<br>TCACCGGCTG    |
|                                                 | delf<br>GCCCCACTCTCCTTTTCCGAGTT<br>GTGAAACCAGGAGG | delr<br>CCTCCTGGTTTCACAACTCGGAA<br>AAGGAGAGTGGGGC |
| ABCC6 primers for ChIP                          | +503<br>CCATGCTGCTATGAACTTTGC                     | +700<br>TTGAAGTTTAGTGGACGTGGC                     |

Supplementary table I: Primers used in this study.
